# Supplementary material for: Genomic and transcriptomic characterization of delta SARS-CoV-2 infection in free-ranging white-tailed deer (Odocoileus virginianus)
Source: PubMed Central journal article supplement — iScience. 2023 Oct 24;26(11):108319. doi: 10.1016/j.isci.2023.108319 (PMC10665813; doi:10.1016/j.isci.2023.108319), 2023-10-24
Supplement: mmc1.pdf [file mmc1.pdf]

**Supplemental information**

**Genomic and transcriptomic characterization  
of delta SARS-CoV-2 infection in free-ranging  
white-tailed deer (*Odocoileus virginianus*)**

**Jonathon D. Kotwa, Briallen Lobb, Ariane Massé, Marianne Gagnier, Patryk Aftanas, Arinjay Banerjee, Andra Banete, Juliette Blais-Savoie, Jeff Bowman, Tore Buchanan, Hsien-Yao Chee, Peter Kruczkiewicz, Kuganya Nirmalarajah, Catherine Soos, Oksana Vernygora, Lily Yip, L. Robbin Lindsay, Allison J. McGeer, Finlay Maguire, Oliver Lung, Andrew C. Doxey, Bradley Pickering, and Samira Mubareka**

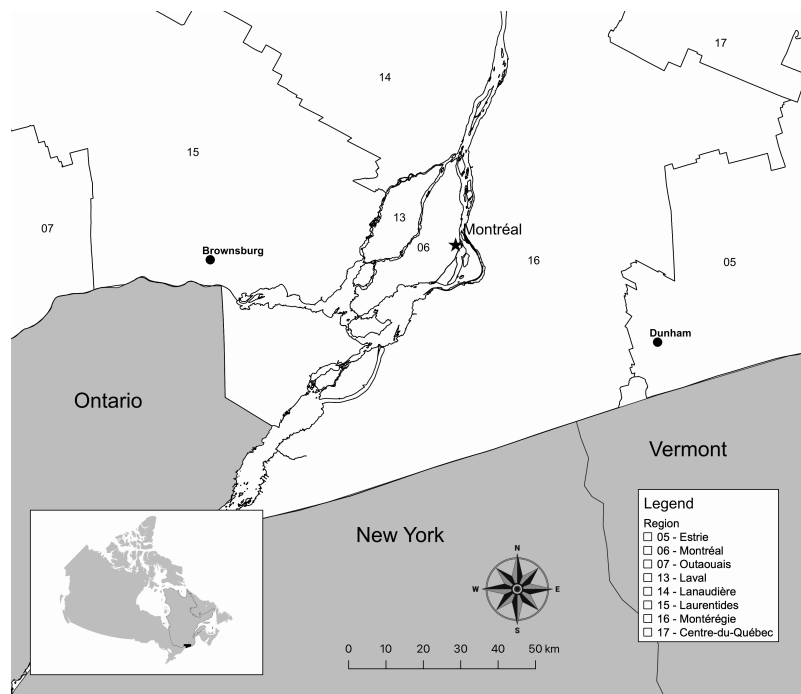

**Figure S1.** Map of southern Québec administrative regions and corresponding identification numbers within the study region. Inset shows location of Québec (outlined) and study region (shaded black) within Canada. Related to Figure 1.

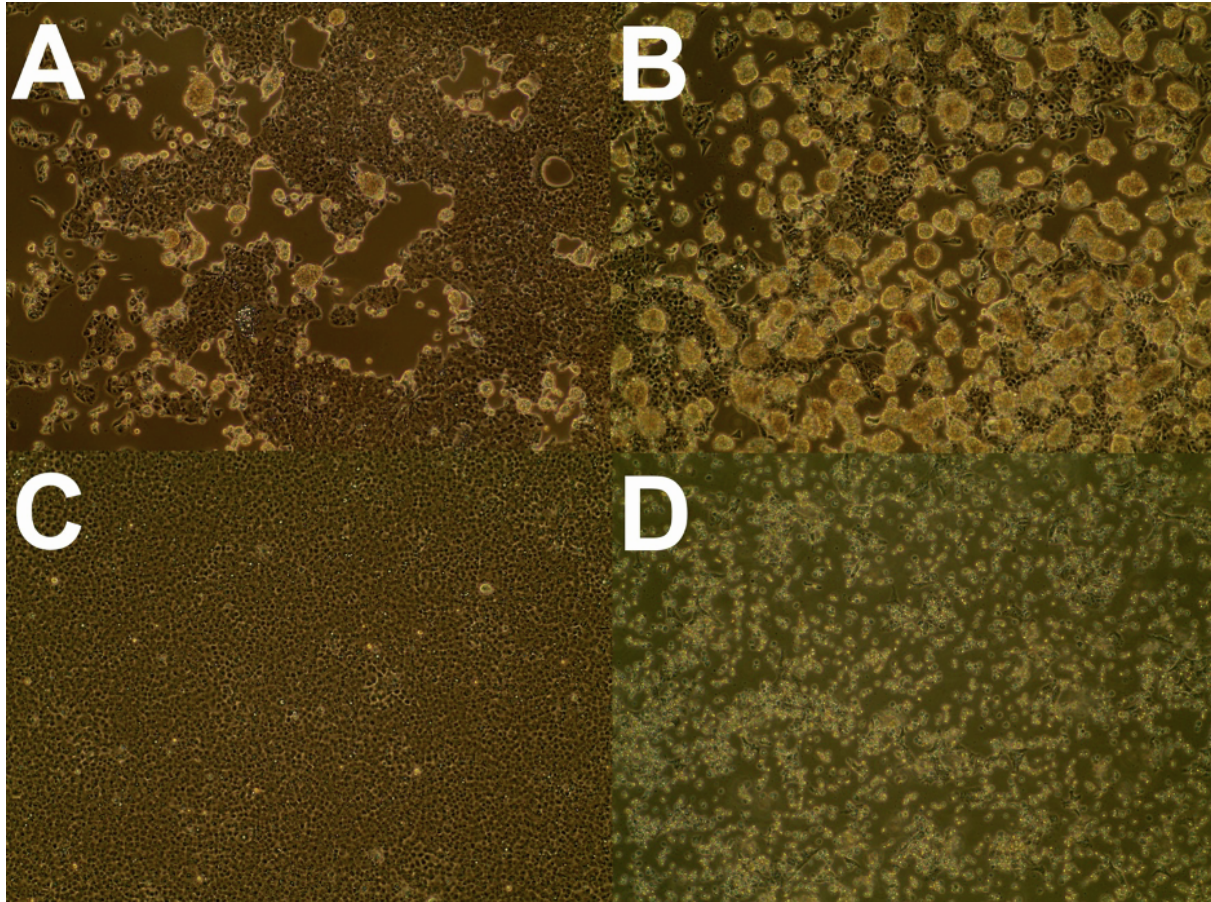

**Figure S2.** Observed cytopathic effect (CPE) in VeroE6 cells inoculated with nasal swabs from SARS-CoV-2 positive white-tailed deer at 5 days post infection. A) sample 4055. B) sample 4249. C) mock inoculated negative control. D) positive control inoculated with a nasopharyngeal clinical specimen from a COVID-19 patient. Magnification was 100x for all panels. Related to Table 1 and Table S1.

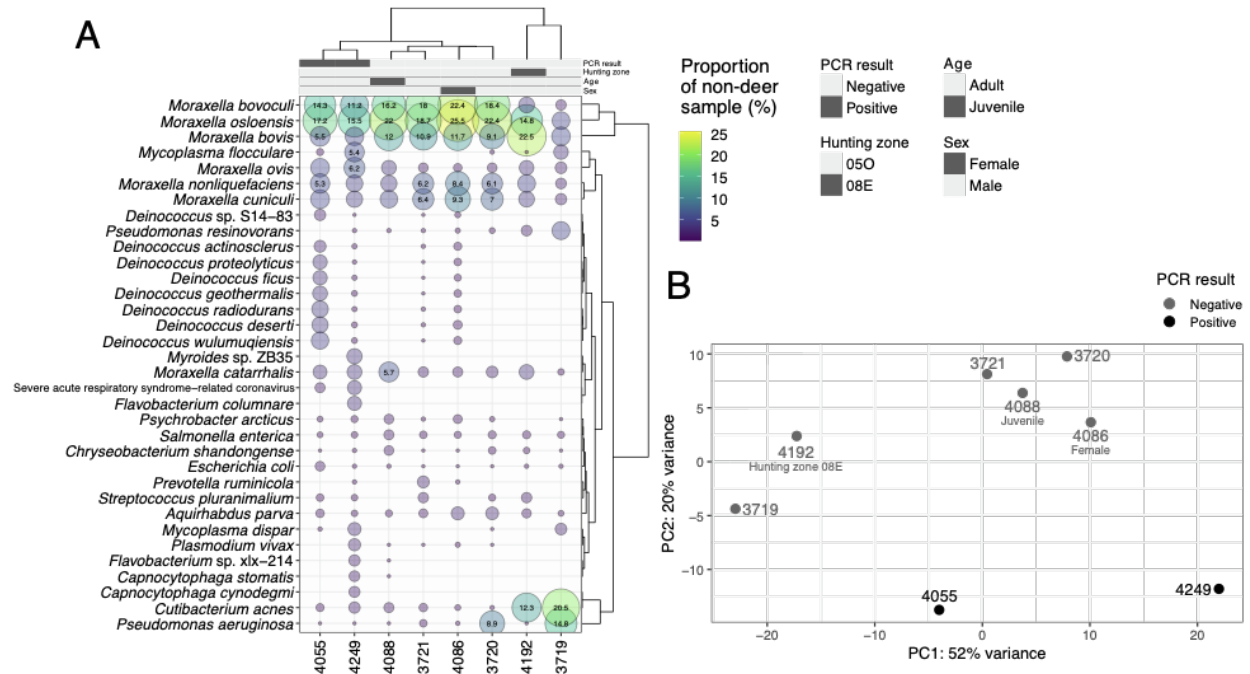

**Figure S3.** RNA-seq taxonomic profiling and PCA of deer transcriptome expression profile. A) Top community members after removal of deer reads. Proportion numbers are only displayed if larger than 5.0%. PCR result refers to the SARS-CoV-2 RT-PCR analysis (see Methods). B) An ordination of the overall WTD gene expression profile. PCA created with the VST transformed gene expression profiles. Metadata other than the PCR result is displayed on the graph under the sample ID. Related to Figure 4 Table S2.

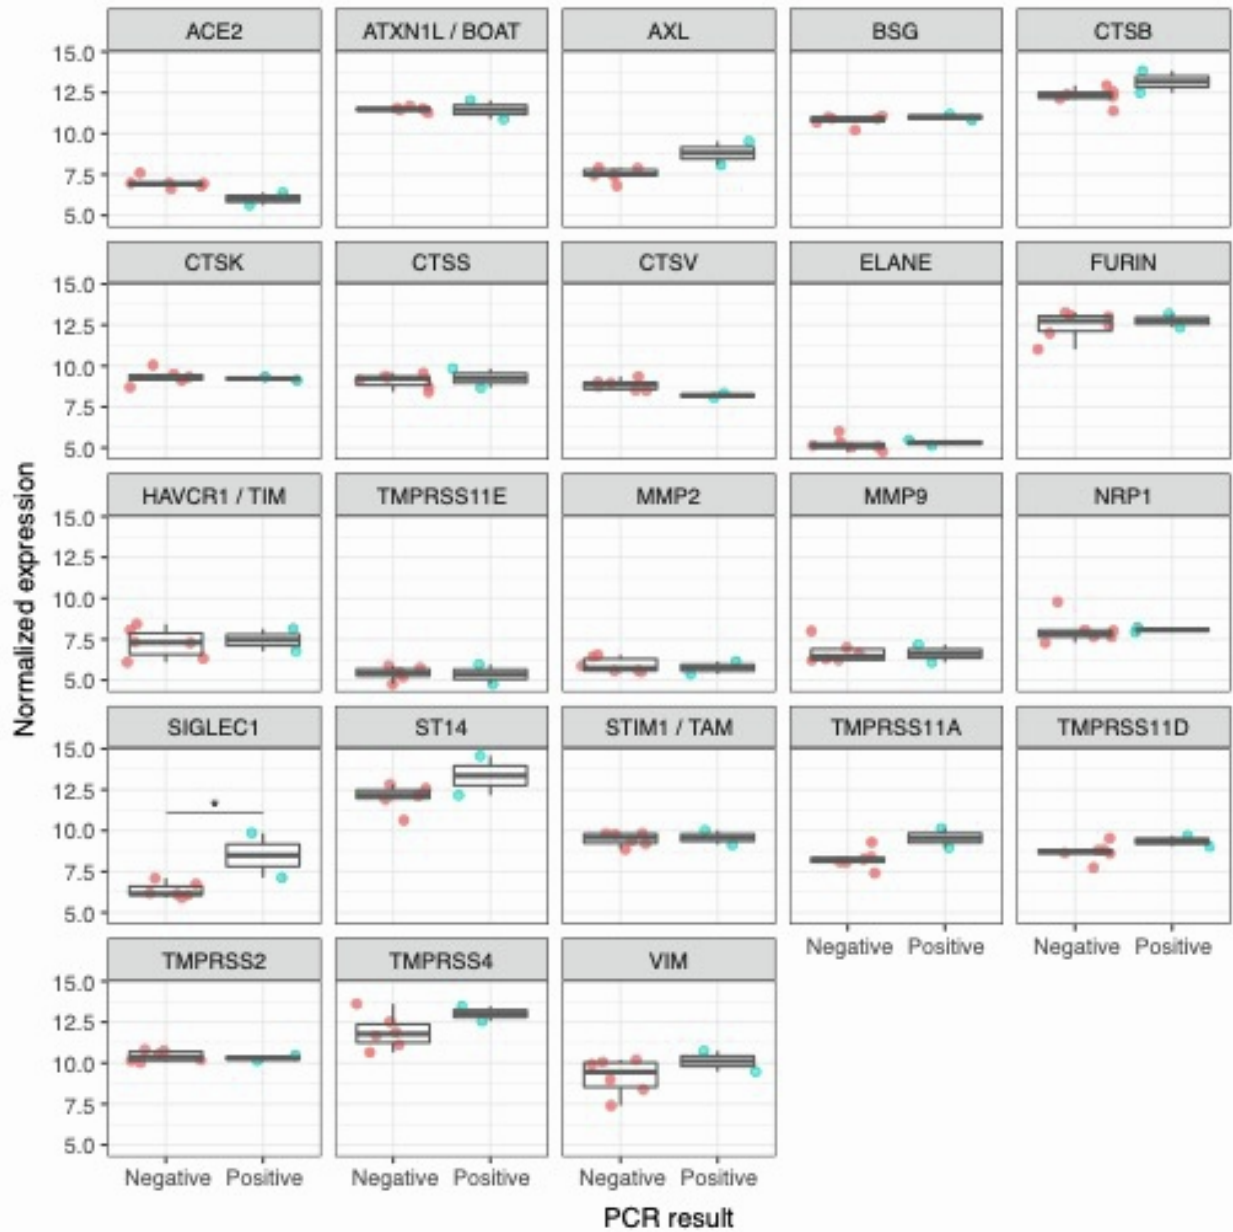

**Figure S4.** Select SARS-CoV-2 viral attachment and entry factors important in human COVID-19 infections with their VST transformed expression value displayed for each deer sample. Genes are labelled with their inferred human gene ortholog. The PCR result identifies which deer samples were SARS-CoV-2 RT-PCR-positive or -negative. Significant differentially expressed genes (adjusted p-value < 0.05) are indicated with an asterisk (\*). Related to Figure 4.

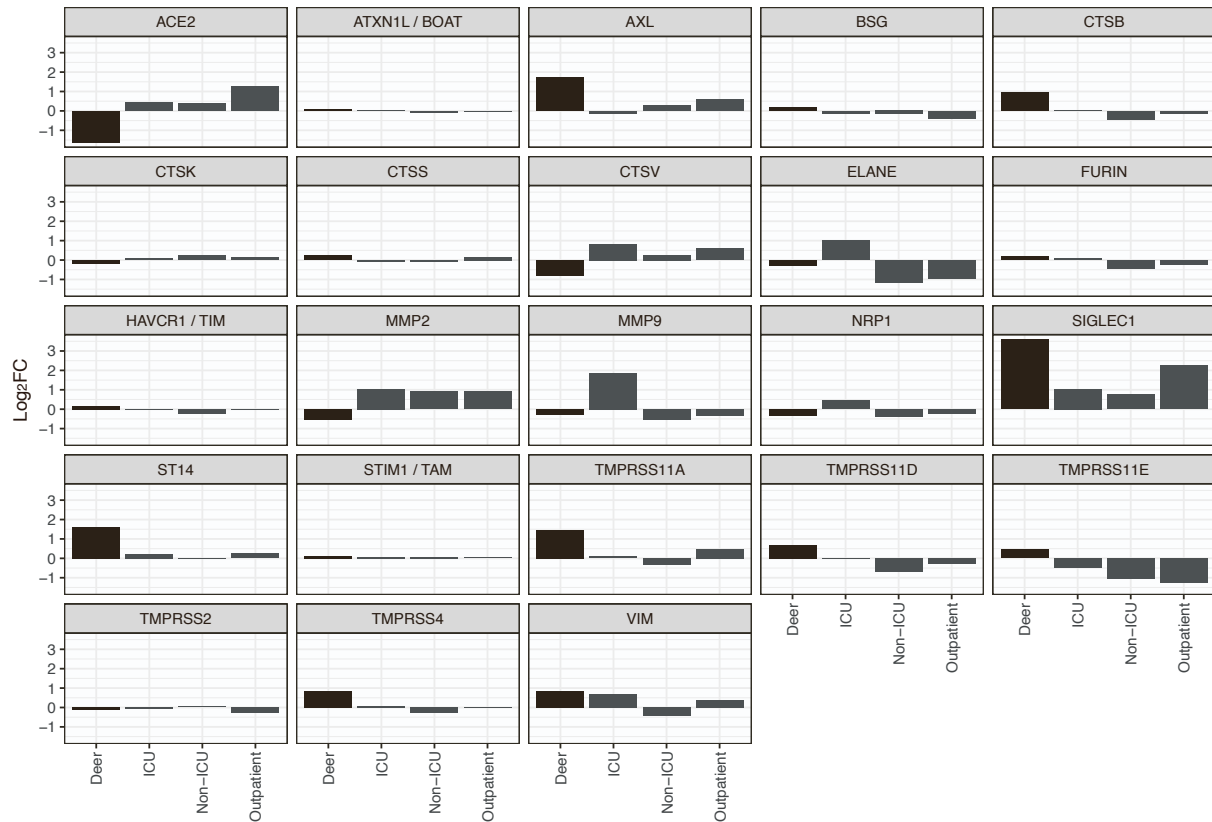

**Figure S5.** Select SARS-CoV-2 viral attachment and entry factors important in human COVID-19 infections with their  $\log_2$  fold change values in deer versus human COVID-19 infections. Human nasopharyngeal swab samples in ICU, non-ICU, and outpatient individuals were compared to nasopharyngeal swab samples from individuals without SARS-CoV-2. Those  $\log_2$  fold change values are displayed here against the deer nasal swab differential gene expression analysis  $\log_2$  fold change values. *HAVCR1* here corresponds to the WTD gene *LOC110145616*. The genes in this figure are labelled with their human gene IDs. Related to Figure 5.
